# Supplementary material
Source: publisher site journal article supplement (https://www.spandidos-publications.com/5092/downloadSupplementary)

Figure S1. Addition of AZD6738 (1 nM) to each concentration of FTD did not inhibit cell viability. HT29, HCT116, DLD-1 and SW480 cells were treated with each concentration of FTD with or without AZD6738 (1 nM). Cells were collected at 72 h and cell viability was evaluated using a WST-1 assay. FTD, trifluridine.

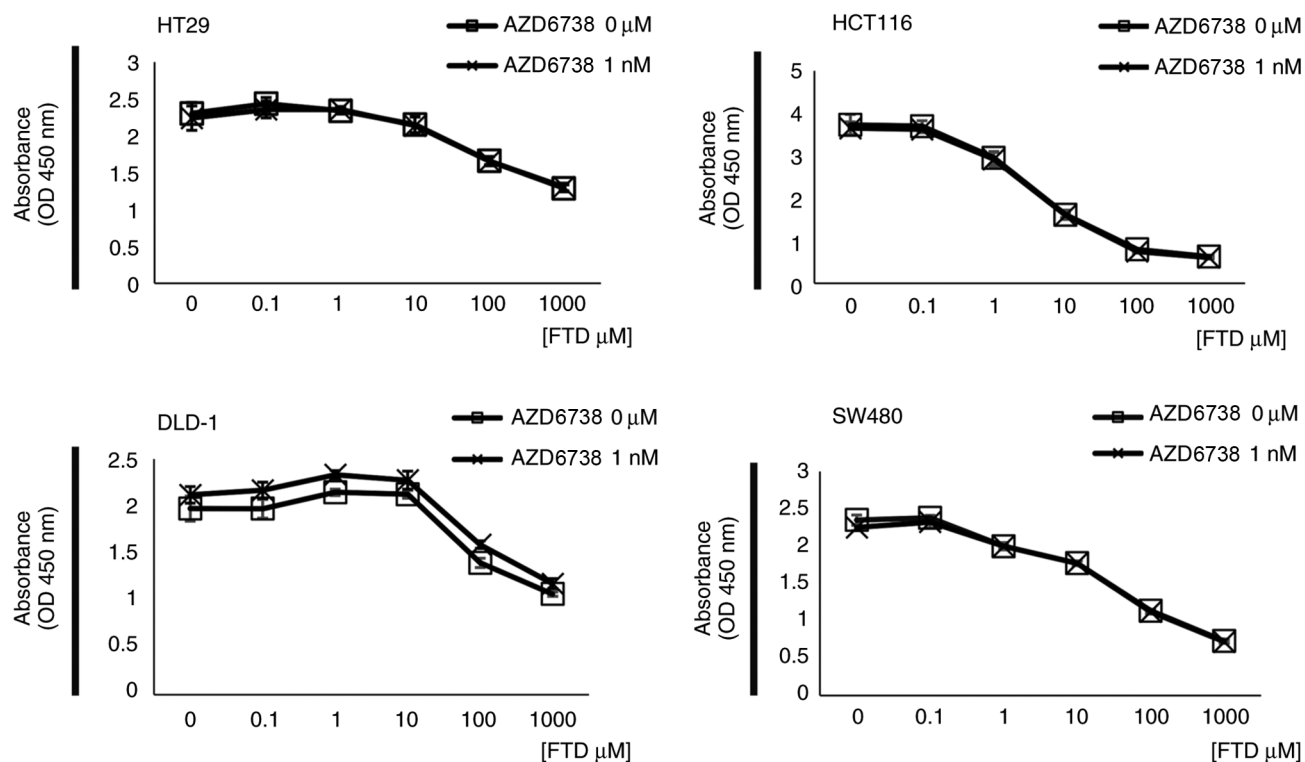

Figure S2. Verification of toxicological effects of tipiracil. Addition of tipiracil to FTD did not affect cell viability. FTD, trifluridine.

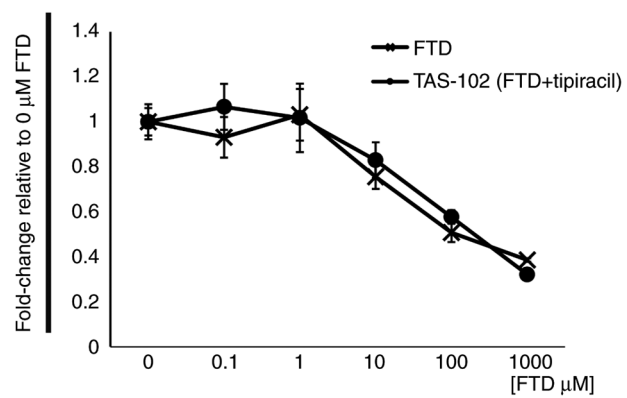

Figure S3. Weights of the livers, kidneys and testes in each group.

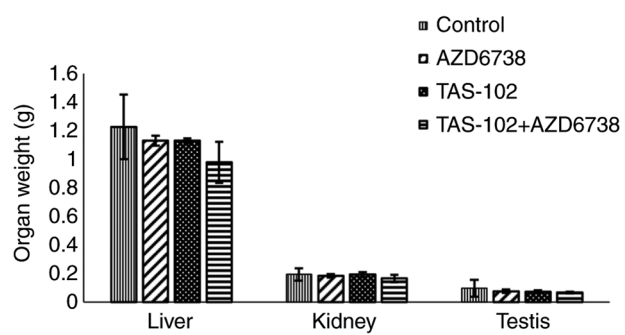

Supplement: Supplementary file 1 [file downloadSupplementary]
